# Supplementary material
Source: PubMed Central journal article supplement (PMC10687648)
Supplement: EIJ-D-23-00590_Nakase_SD.pdf [file EIJ-D-23-00590_Nakase_SD.pdf]

## Supplementary data

**Supplementary Table 1. Baseline characteristics of high-gradient aortic stenosis.**

|                                                   | Total       | Early stage | Advanced stage | P-value |
|---------------------------------------------------|-------------|-------------|----------------|---------|
|                                                   | N=1045      | N=516       | N=529          |         |
| Age, years                                        | 82.4 ± 5.9  | 82.3 ± 5.5  | 82.6 ± 6.3     | 0.349   |
| Female, n (%)                                     | 565 (54.1)  | 267 (51.7)  | 298 (56.3)     | 0.137   |
| Body mass index, kg/cm <sup>2</sup>               | 26.4 ± 5.5  | 26.6 ± 5.6  | 26.1 ± 5.5     | 0.099   |
| STS-PROM, %                                       | 5.4 ± 4.1   | 4.7 ± 3.1   | 6.2 ± 4.7      | <0.001  |
| NYHA III or IV, n (%)                             | 679 (65.0)  | 316 (61.2)  | 363 (68.6)     | 0.012   |
| <b>Concomitant diseases</b>                       |             |             |                |         |
| Hypertension, n (%)                               | 882 (84.4)  | 436 (84.5)  | 446 (84.3)     | 0.934   |
| Diabetes mellitus, n (%)                          | 256 (24.5)  | 113 (21.9)  | 143 (27.0)     | 0.054   |
| CKD (eGFR <60 mL/min/1.73 m <sup>2</sup> ), n (%) | 720 (69.0)  | 331 (64.3)  | 389 (73.5)     | 0.001   |
| eGFR, mL/min/1.73 m <sup>2</sup>                  | 52.5 ± 21.7 | 55.0 ± 22.1 | 50.0 ± 21.0    | <0.001  |
| COPD, n (%)                                       | 114 (10.9)  | 49 (9.5)    | 65 (12.3)      | 0.145   |
| Coronary artery disease, n (%)                    | 580 (55.5)  | 275 (53.3)  | 305 (57.7)     | 0.156   |
| Atrial fibrillation, n (%)                        | 311 (29.8)  | 124 (24.0)  | 187 (35.3)     | <0.001  |
| <b>Previous history</b>                           |             |             |                |         |
| Previous myocardial infarction, n (%)             | 120 (11.5)  | 45 (8.7)    | 75 (14.2)      | 0.006   |
| Previous cardiac surgery, n (%)                   | 109 (10.4)  | 43 (8.3)    | 66 (12.5)      | 0.028   |
| Previous stroke, n (%)                            | 115 (11.0)  | 60 (11.6)   | 55 (10.4)      | 0.525   |
| Previous permanent pacemaker implantation, n (%)  | 63 (6.0)    | 23 (4.5)    | 40 (7.6)       | 0.035   |
| Peripheral artery disease, n (%)                  | 138 (13.2)  | 60 (11.6)   | 78 (14.7)      | 0.137   |
| <b>Echocardiography</b>                           |             |             |                |         |

|                                                                                                                                                                                                                                  |               |               |               |        |
|----------------------------------------------------------------------------------------------------------------------------------------------------------------------------------------------------------------------------------|---------------|---------------|---------------|--------|
| Aortic Valve Area, cm <sup>2</sup>                                                                                                                                                                                               | 0.63 ± 0.23   | 0.65 ± 0.21   | 0.61 ± 0.24   | 0.002  |
| Mean Aortic valve pressure gradient, mmHg                                                                                                                                                                                        | 53 ± 13       | 53 ± 12       | 54 ± 14       | 0.255  |
| Left ventricular ejection fraction, %                                                                                                                                                                                            | 57 ± 13       | 61 ± 10       | 53 ± 14       | <0.001 |
| Left ventricular mass index, g/m <sup>2</sup>                                                                                                                                                                                    | 139 ± 44      | 134 ± 44      | 143 ± 46      | 0.004  |
| Left atrial volume index, mL/m <sup>2</sup>                                                                                                                                                                                      | 43 ± 16       | 41 ± 14       | 46 ± 17       | <0.001 |
| Mitral regurgitation ≥moderate, n (%)                                                                                                                                                                                            | 217 (21.0)    | 58 (11.4)     | 159 (30.4)    | <0.001 |
| Tricuspid regurgitation ≥moderate, n (%)                                                                                                                                                                                         | 161 (15.6)    | 0 (0)         | 161 (30.6)    | <0.001 |
| Systolic pulmonary artery pressure, mmHg                                                                                                                                                                                         | 46 ± 18       | 37 ± 15       | 56 ± 17       | <0.001 |
| Tricuspid annular plane systolic excursion, cm                                                                                                                                                                                   | 21 ± 5        | 23 ± 4        | 19 ± 6        | <0.001 |
| Stroke volume index, mL/m <sup>2</sup>                                                                                                                                                                                           | 34 ± 12       | 35 ± 11       | 33 ± 12       | 0.005  |
| <b>Computed tomography</b>                                                                                                                                                                                                       |               |               |               |        |
| Aortic valvular complex calcification, mm <sup>3</sup>                                                                                                                                                                           | 442.4 ± 423.8 | 429.0 ± 379.7 | 456.8 ± 466.8 | 0.324  |
| <b>Right heart catheterisation</b>                                                                                                                                                                                               |               |               |               |        |
| Mean pulmonary artery pressure, mmHg                                                                                                                                                                                             | 31 ± 12       | 25 ± 9        | 36 ± 13       | <0.001 |
| STS-PROM = Society of Thoracic Surgeons Predicted Risk of Mortality; NYHA = New York Heart Association; CKD = chronic kidney disease; eGFR = estimated glomerular filtration rate; COPD = chronic obstructive pulmonary disease. |               |               |               |        |

**Supplementary Table 2. Baseline characteristics of classical low-flow low-gradient aortic stenosis.**

|                                                   | Total       | Early stage | Advanced stage | P-value |
|---------------------------------------------------|-------------|-------------|----------------|---------|
|                                                   | N=337       | N=89        | N=248          |         |
| Age, years                                        | 81.0 ± 7.5  | 82.0 ± 6.8  | 80.8 ± 7.7     | 0.182   |
| Female, n (%)                                     | 109 (32.3)  | 27 (30.3)   | 82 (33.1)      | 0.637   |
| Body mass index, kg/cm <sup>2</sup>               | 25.8 ± 5.2  | 26.5 ± 5.0  | 25.5 ± 5.3     | 0.124   |
| STS-PROM, %                                       | 7.0 ± 5.3   | 6.2 ± 4.9   | 7.3 ± 5.4      | 0.120   |
| NYHA III or IV, n (%)                             | 262 (78.0)  | 64 (71.9)   | 198 (80.2)     | 0.107   |
| <b>Concomitant diseases</b>                       |             |             |                |         |
| Hypertension, n (%)                               | 289 (85.8)  | 80 (89.9)   | 209 (84.3)     | 0.194   |
| Diabetes mellitus, n (%)                          | 113 (33.5)  | 28 (31.5)   | 85 (34.3)      | 0.630   |
| CKD (eGFR <60 mL/min/1.73 m <sup>2</sup> ), n (%) | 238 (70.6)  | 56 (62.9)   | 182 (73.4)     | 0.063   |
| eGFR, mL/min/1.73 m <sup>2</sup>                  | 50.2 ± 22.1 | 53.3 ± 22.4 | 49.1 ± 22.0    | 0.116   |
| COPD, n (%)                                       | 47 (14.0)   | 12 (13.5)   | 35 (14.2)      | 0.873   |
| Coronary artery disease, n (%)                    | 231 (68.5)  | 66 (74.2)   | 165 (66.5)     | 0.184   |
| Atrial fibrillation, n (%)                        | 161 (47.8)  | 34 (38.2)   | 127 (51.2)     | 0.035   |
| <b>Previous history</b>                           |             |             |                |         |
| Previous myocardial infarction, n (%)             | 97 (28.8)   | 29 (32.6)   | 68 (27.4)      | 0.356   |
| Previous cardiac surgery, n (%)                   | 81 (24.0)   | 17 (19.1)   | 64 (25.8)      | 0.204   |
| Previous stroke, n (%)                            | 52 (15.4)   | 12 (13.5)   | 40 (16.1)      | 0.553   |
| Previous permanent pacemaker implantation, n (%)  | 49 (14.5)   | 8 (9.0)     | 41 (16.5)      | 0.083   |
| Peripheral artery disease, n (%)                  | 61 (18.1)   | 15 (16.9)   | 46 (18.5)      | 0.722   |
| <b>Echocardiography</b>                           |             |             |                |         |
| Aortic Valve Area, cm <sup>2</sup>                | 0.76 ± 0.28 | 0.78 ± 0.25 | 0.76 ± 0.30    | 0.658   |
| Mean Aortic valve pressure gradient, mmHg         | 24 ± 9      | 26 ± 8      | 23 ± 9         | 0.008   |

|                                                                                                                                                                                                                                  |               |               |               |        |
|----------------------------------------------------------------------------------------------------------------------------------------------------------------------------------------------------------------------------------|---------------|---------------|---------------|--------|
| Left ventricular ejection fraction, %                                                                                                                                                                                            | 32 ± 11       | 35 ± 10       | 31 ± 12       | 0.004  |
| Left ventricular mass index, g/m <sup>2</sup>                                                                                                                                                                                    | 147 ± 51      | 150 ± 59      | 146 ± 47      | 0.564  |
| Left atrial volume index, mL/m <sup>2</sup>                                                                                                                                                                                      | 49 ± 23       | 41 ± 13       | 53 ± 25       | <0.001 |
| Mitral regurgitation ≥moderate, n (%)                                                                                                                                                                                            | 141 (42.7)    | 28 (32.9)     | 113 (46.1)    | 0.034  |
| Tricuspid regurgitation ≥moderate, n (%)                                                                                                                                                                                         | 90 (27.4)     | 0 (0)         | 90 (37.0)     | <0.001 |
| Systolic pulmonary artery pressure, mmHg                                                                                                                                                                                         | 49 ± 19       | 34 ± 15       | 55 ± 16       | <0.001 |
| Tricuspid annular plane systolic excursion, cm                                                                                                                                                                                   | 17 ± 6        | 22 ± 4        | 15 ± 5        | <0.001 |
| Stroke volume index, mL/m <sup>2</sup>                                                                                                                                                                                           | 25 ± 6        | 27 ± 5        | 24 ± 6        | <0.001 |
| <b>Computed tomography</b>                                                                                                                                                                                                       |               |               |               |        |
| Aortic valvular complex calcification, mm <sup>3</sup>                                                                                                                                                                           | 213.2 ± 229.9 | 233.7 ± 264.3 | 204.5 ± 213.5 | 0.028  |
| <b>Right heart catheterisation</b>                                                                                                                                                                                               |               |               |               |        |
| Mean pulmonary artery pressure, mmHg                                                                                                                                                                                             | 34 ± 12       | 23 ± 8        | 37 ± 11       | <0.001 |
| STS-PROM = Society of Thoracic Surgeons Predicted Risk of Mortality; NYHA = New York Heart Association; CKD = chronic kidney disease; eGFR = estimated glomerular filtration rate; COPD = chronic obstructive pulmonary disease. |               |               |               |        |

**Supplementary Table 3. Baseline characteristics of low-flow low-gradient aortic stenosis with preserved ejection fraction.**

|                                                   | Total       | Early stage | Advanced stage | P-value |
|---------------------------------------------------|-------------|-------------|----------------|---------|
|                                                   | N=394       | N=175       | N=219          |         |
| Age, years                                        | 82.0 ± 6.6  | 81.9 ± 6.4  | 82.1 ± 6.8     | 0.844   |
| Female, n (%)                                     | 220 (55.8)  | 93 (53.1)   | 127 (57.9)     | 0.094   |
| Body mass index, kg/cm <sup>2</sup>               | 27.0 ± 5.7  | 27.1 ± 5.7  | 26.9 ± 5.7     | 0.674   |
| STS-PROM, %                                       | 5.1 ± 3.2   | 4.7 ± 2.6   | 5.5 ± 3.5      | 0.009   |
| NYHA III or IV, n (%)                             | 273 (69.3)  | 120 (68.6)  | 153 (69.9)     | 0.782   |
| <b>Concomitant diseases</b>                       |             |             |                |         |
| Hypertension, n (%)                               | 342 (86.8)  | 152 (86.9)  | 190 (86.8)     | 0.977   |
| Diabetes mellitus, n (%)                          | 116 (29.4)  | 50 (28.6)   | 66 (30.1)      | 0.735   |
| CKD (eGFR <60 mL/min/1.73 m <sup>2</sup> ), n (%) | 267 (67.8)  | 119 (68.0)  | 148 (67.6)     | 0.929   |
| eGFR, mL/min/1.73 m <sup>2</sup>                  | 53.1 ± 21.6 | 53.9 ± 20.5 | 52.3 ± 22.6    | 0.480   |
| COPD, n (%)                                       | 61 (15.5)   | 23 (13.1)   | 38 (17.4)      | 0.251   |
| Coronary artery disease, n (%)                    | 240 (60.9)  | 115 (65.7)  | 125 (57.1)     | 0.081   |
| Atrial fibrillation, n (%)                        | 167 (42.4)  | 46 (26.3)   | 121 (55.3)     | <0.001  |
| <b>Previous history</b>                           |             |             |                |         |
| Previous myocardial infarction, n (%)             | 51 (12.9)   | 25 (14.3)   | 26 (11.9)      | 0.478   |
| Previous cardiac surgery, n (%)                   | 64 (16.2)   | 23 (13.1)   | 41 (18.7)      | 0.136   |
| Previous stroke, n (%)                            | 49 (12.4)   | 21 (12.0)   | 28 (12.8)      | 0.814   |
| Previous permanent pacemaker implantation, n (%)  | 42 (10.7)   | 14 (8.0)    | 28 (12.8)      | 0.126   |
| Peripheral artery disease, n (%)                  | 57 (14.5)   | 26 (14.9)   | 31 (14.2)      | 0.844   |
| <b>Echocardiography</b>                           |             |             |                |         |
| Aortic Valve Area, cm <sup>2</sup>                | 0.77 ± 0.26 | 0.76 ± 0.26 | 0.78 ± 0.26    | 0.466   |
| Mean Aortic valve pressure gradient, mmHg         | 27 ± 8      | 27 ± 8      | 27 ± 8         | 0.518   |

|                                                                                                                                                                                                                                  |               |               |               |        |
|----------------------------------------------------------------------------------------------------------------------------------------------------------------------------------------------------------------------------------|---------------|---------------|---------------|--------|
| Left ventricular ejection fraction, %                                                                                                                                                                                            | 61 ± 7        | 63 ± 7        | 60 ± 7        | <0.001 |
| Left ventricular mass index, g/m <sup>2</sup>                                                                                                                                                                                    | 121 ± 41      | 119 ± 39      | 124 ± 41      | 0.304  |
| Left atrial volume index, mL/m <sup>2</sup>                                                                                                                                                                                      | 42 ± 17       | 37 ± 14       | 46 ± 18       | <0.001 |
| Mitral regurgitation ≥moderate, n (%)                                                                                                                                                                                            | 80 (20.6)     | 18 (10.3)     | 62 (29.0)     | <0.001 |
| Tricuspid regurgitation ≥moderate, n (%)                                                                                                                                                                                         | 84 (21.6)     | 0 (0)         | 84 (39.1)     | <0.001 |
| Systolic pulmonary artery pressure, mmHg                                                                                                                                                                                         | 46 ± 18       | 37 ± 13       | 53 ± 18       | <0.001 |
| Tricuspid annular plane systolic excursion, cm                                                                                                                                                                                   | 19 ± 5        | 22 ± 4        | 17 ± 5        | <0.001 |
| Stroke volume index, mL/m <sup>2</sup>                                                                                                                                                                                           | 26 ± 6        | 26 ± 6        | 26 ± 6        | 0.784  |
| <b>Computed tomography</b>                                                                                                                                                                                                       |               |               |               |        |
| Aortic valvular complex calcification, mm <sup>3</sup>                                                                                                                                                                           | 206.3 ± 273.2 | 225.4 ± 244.5 | 189.1 ± 296.4 | 0.218  |
| <b>Right heart catheterisation</b>                                                                                                                                                                                               |               |               |               |        |
| Mean pulmonary artery pressure, mmHg                                                                                                                                                                                             | 30 ± 12       | 24 ± 8        | 34 ± 13       | <0.001 |
| STS-PROM = Society of Thoracic Surgeons Predicted Risk of Mortality; NYHA = New York Heart Association; CKD = chronic kidney disease; eGFR = estimated glomerular filtration rate; COPD = chronic obstructive pulmonary disease. |               |               |               |        |

**Supplementary Table 4. Baseline characteristics of normal-flow low-gradient aortic stenosis.**

|                                                   | Total       | Early stage | Advanced stage | P-value |
|---------------------------------------------------|-------------|-------------|----------------|---------|
|                                                   | N=314       | N=152       | N=162          |         |
| Age, years                                        | 81.5 ± 6.3  | 81.0 ± 6.5  | 82.0 ± 6.0     | 0.142   |
| Female, n (%)                                     | 155 (49.4)  | 70 (46.1)   | 85 (52.5)      | 0.256   |
| Body mass index, kg/cm <sup>2</sup>               | 25.9 ± 5.1  | 25.4 ± 4.7  | 26.4 ± 5.4     | 0.083   |
| STS-PROM, %                                       | 5.1 ± 3.5   | 4.8 ± 3.5   | 5.4 ± 3.5      | 0.114   |
| NYHA III or IV, n (%)                             | 197 (62.7)  | 85 (55.9)   | 112 (69.1)     | 0.016   |
| <b>Concomitant diseases</b>                       |             |             |                |         |
| Hypertension, n (%)                               | 280 (89.2)  | 128 (84.2)  | 152 (93.8)     | 0.006   |
| Diabetes mellitus, n (%)                          | 76 (24.2)   | 33 (21.7)   | 43 (26.5)      | 0.318   |
| CKD (eGFR <60 mL/min/1.73 m <sup>2</sup> ), n (%) | 219 (70.0)  | 100 (65.8)  | 119 (73.9)     | 0.117   |
| eGFR, mL/min/1.73 m <sup>2</sup>                  | 50.6 ± 22.5 | 52.8 ± 22.9 | 48.1 ± 22.0    | 0.069   |
| COPD, n (%)                                       | 43 (13.7)   | 21 (13.9)   | 22 (13.6)      | 0.933   |
| Coronary artery disease, n (%)                    | 194 (61.8)  | 83 (54.6)   | 111 (68.5)     | 0.011   |
| Atrial fibrillation, n (%)                        | 104 (33.1)  | 46 (30.3)   | 58 (35.8)      | 0.297   |
| <b>Previous history</b>                           |             |             |                |         |
| Previous myocardial infarction, n (%)             | 40 (12.7)   | 16 (10.5)   | 24 (14.8)      | 0.225   |
| Previous cardiac surgery, n (%)                   | 57 (18.2)   | 20 (13.2)   | 37 (22.8)      | 0.026   |
| Previous stroke, n (%)                            | 44 (14.0)   | 23 (15.1)   | 21 (13.0)      | 0.580   |
| Previous permanent pacemaker implantation, n (%)  | 28 (8.9)    | 11 (7.2)    | 17 (10.5)      | 0.312   |
| Peripheral artery disease, n (%)                  | 43 (13.7)   | 24 (15.8)   | 19 (11.7)      | 0.296   |
| <b>Echocardiography</b>                           |             |             |                |         |
| Aortic Valve Area, cm <sup>2</sup>                | 0.85 ± 0.30 | 0.81 ± 0.29 | 0.88 ± 0.31    | 0.037   |
| Mean Aortic valve pressure gradient, mmHg         | 28 ± 9      | 29 ± 8      | 27 ± 9         | 0.003   |

|                                                                                                                                                                                                                                  |               |               |               |        |
|----------------------------------------------------------------------------------------------------------------------------------------------------------------------------------------------------------------------------------|---------------|---------------|---------------|--------|
| Left ventricular ejection fraction, %                                                                                                                                                                                            | 63 ± 7        | 64 ± 7        | 62 ± 7        | 0.040  |
| Left ventricular mass index, g/m <sup>2</sup>                                                                                                                                                                                    | 124 ± 41      | 122 ± 38      | 126 ± 44      | 0.527  |
| Left atrial volume index, mL/m <sup>2</sup>                                                                                                                                                                                      | 42 ± 24       | 37 ± 12       | 47 ± 32       | <0.001 |
| Mitral regurgitation ≥moderate, n (%)                                                                                                                                                                                            | 59 (19.2)     | 12 (8.0)      | 47 (29.7)     | <0.001 |
| Tricuspid regurgitation ≥moderate, n (%)                                                                                                                                                                                         | 52 (16.7)     | 0 (0)         | 52 (32.3)     | <0.001 |
| Systolic pulmonary artery pressure, mmHg                                                                                                                                                                                         | 43 ± 16       | 35 ± 13       | 50 ± 15       | <0.001 |
| Tricuspid annular plane systolic excursion, cm                                                                                                                                                                                   | 21 ± 5        | 23 ± 4        | 20 ± 6        | <0.001 |
| Stroke volume index, mL/m <sup>2</sup>                                                                                                                                                                                           | 45 ± 12       | 45 ± 11       | 45 ± 12       | 0.698  |
| <b>Computed tomography</b>                                                                                                                                                                                                       |               |               |               |        |
| Aortic valvular complex calcification, mm <sup>3</sup>                                                                                                                                                                           | 200.3 ± 203.6 | 224.7 ± 215.5 | 173.9 ± 187.2 | 0.039  |
| <b>Right heart catheterisation</b>                                                                                                                                                                                               |               |               |               |        |
| Mean pulmonary artery pressure, mmHg                                                                                                                                                                                             | 28 ± 9        | 23 ± 7        | 32 ± 9        | <0.001 |
| STS-PROM = Society of Thoracic Surgeons Predicted Risk of Mortality; NYHA = New York Heart Association; CKD = chronic kidney disease; eGFR = estimated glomerular filtration rate; COPD = chronic obstructive pulmonary disease. |               |               |               |        |



**Supplementary Table 5. Clinical outcomes according to four cardiac stages in each AS subtype.**

|                                           | HG-AS                                                  | Classical LF-LG                                        | LF LG-AS with pEF                                     | NFLG                                                  |
|-------------------------------------------|--------------------------------------------------------|--------------------------------------------------------|-------------------------------------------------------|-------------------------------------------------------|
|                                           | N=1045                                                 | N=337                                                  | N=394                                                 | N=314                                                 |
| <b>All-cause mortality at 1 year</b>      |                                                        |                                                        |                                                       |                                                       |
| Stage 0 and 1, n (%)                      | 5 (3.6%)<br>reference                                  | 2 (20.0%)<br>reference                                 | 6 (9.8%)<br>reference                                 | 5 (10.2%)<br>reference                                |
| Stage 2, n (%)                            | 30 (8.6%)<br>HR 2.14 [0.83-5.54]<br><i>P</i> = 0.117   | 5 (7.8%)<br>HR 0.35 [0.07-1.81]<br><i>P</i> = 0.210    | 11 (10.5%)<br>HR 0.85 [0.31-2.35]<br><i>P</i> = 0.754 | 10 (11.6%)<br>HR 1.06 [0.35-3.19]<br><i>P</i> = 0.920 |
| Stage 3, n (%)                            | 43 (16.6%)<br>HR 3.73 [1.45-9.59]<br><i>P</i> = 0.006  | 13 (23.6%)<br>HR 1.05 [0.23-4.72]<br><i>P</i> = 0.948  | 19 (20.0%)<br>HR 1.34 [0.52-3.47]<br><i>P</i> = 0.544 | 12 (14.6%)<br>HR 1.40 [0.49-4.01]<br><i>P</i> = 0.532 |
| Stage 4, n (%)                            | 46 (22.7%)<br>HR 5.46 [2.11-14.13]<br><i>P</i> <0.001  | 44 (30.6%)<br>HR 1.54 [0.36-6.56]<br><i>P</i> = 0.560  | 23 (24.5%)<br>HR 1.64 [0.63-4.25]<br><i>P</i> = 0.311 | 11 (20.4%)<br>HR 1.32 [0.45-3.92]<br><i>P</i> = 0.615 |
| <b>Cardiovascular mortality at 1 year</b> |                                                        |                                                        |                                                       |                                                       |
| Stage 0 and 1, n (%)                      | 3 (2.1%)<br>reference                                  | 0 (0%)                                                 | 3 (4.9%)<br>reference                                 | 1 (2.0%)<br>reference                                 |
| Stage 2, n (%)                            | 18 (5.1%)<br>HR 2.00 [0.58-6.84]<br><i>P</i> = 0.270   | 4 (6.3%)<br>reference                                  | 8 (7.6%)<br>HR 1.14 [0.30-4.37]<br><i>P</i> = 0.852   | 4 (4.7%)<br>HR 2.41 [0.26-22.44]<br><i>P</i> = 0.441  |
| Stage 3, n (%)                            | 28 (10.8%)<br>HR 3.54 [1.05-11.98]<br><i>P</i> = 0.042 | 8 (14.5%)<br>HR 2.37 [0.72-7.68]<br><i>P</i> = 0.178   | 13 (13.7%)<br>HR 1.69 [0.46-6.15]<br><i>P</i> = 0.427 | 8 (9.8%)<br>HR 5.56 [0.68-45.30]<br><i>P</i> = 0.109  |
| Stage 4, n (%)                            | 31 (15.3%)<br>HR 5.50 [1.62-18.66]<br><i>P</i> = 0.006 | 36 (25.0%)<br>HR 4.38 [1.48-11.97]<br><i>P</i> = 0.008 | 18 (19.1%)<br>HR 2.25 [0.62-8.15]<br><i>P</i> = 0.216 | 6 (11.1%)<br>HR 3.59 [0.41-31.46]<br><i>P</i> = 0.248 |

| <b>All-cause mortality at 5 year</b>                                                                                                                                                                                                                                                                                                                                                                                                 |                                                        |                                                       |                                                       |                                                       |
|--------------------------------------------------------------------------------------------------------------------------------------------------------------------------------------------------------------------------------------------------------------------------------------------------------------------------------------------------------------------------------------------------------------------------------------|--------------------------------------------------------|-------------------------------------------------------|-------------------------------------------------------|-------------------------------------------------------|
| Stage 0 and 1, n (%)                                                                                                                                                                                                                                                                                                                                                                                                                 | 34 (26.7%)<br>reference                                | 6 (66.0%)<br>reference                                | 18 (34.3%)<br>reference                               | 14 (33.5%)<br>reference                               |
| Stage 2, n (%)                                                                                                                                                                                                                                                                                                                                                                                                                       | 130 (41.7%)<br>HR 1.54 [1.05-2.25]<br><i>P</i> = 0.026 | 31 (54.4%)<br>HR 0.62 [0.25-1.50]<br><i>P</i> = 0.287 | 45 (46.2%)<br>HR 1.23 [0.70-2.15]<br><i>P</i> = 0.477 | 27 (35.8%)<br>HR 0.92 [0.48-1.77]<br><i>P</i> = 0.796 |
| Stage 3, n (%)                                                                                                                                                                                                                                                                                                                                                                                                                       | 129 (57.0%)<br>HR 2.35 [1.59-3.46]<br><i>P</i> <0.001  | 31 (67.2%)<br>HR 0.81 [0.33-1.98]<br><i>P</i> = 0.643 | 51 (61.2%)<br>HR 1.88 [1.08-3.28]<br><i>P</i> = 0.027 | 29 (47.6%)<br>HR 1.36 [0.71-2.59]<br><i>P</i> = 0.359 |
| Stage 4, n (%)                                                                                                                                                                                                                                                                                                                                                                                                                       | 104 (54.8%)<br>HR 2.28 [1.51-3.43]<br><i>P</i> <0.001  | 83 (64.5%)<br>HR 1.00 [0.42-2.35]<br><i>P</i> = 0.996 | 55 (66.7%)<br>HR 2.02 [1.16-3.52]<br><i>P</i> = 0.013 | 26 (50.4%)<br>HR 1.31 [0.66-2.57]<br><i>P</i> = 0.439 |
| <b>Cardiovascular mortality at 5 year</b>                                                                                                                                                                                                                                                                                                                                                                                            |                                                        |                                                       |                                                       |                                                       |
| Stage 0 and 1, n (%)                                                                                                                                                                                                                                                                                                                                                                                                                 | 23 (19.3%)<br>reference                                | 3 (52.9%)<br>reference                                | 10 (21.1%)<br>reference                               | 7 (18.9%)<br>reference                                |
| Stage 2, n (%)                                                                                                                                                                                                                                                                                                                                                                                                                       | 80 (29.8%)<br>HR 1.41 [0.88-2.25]<br><i>P</i> = 0.149  | 23 (42.1%)<br>HR 0.86 [0.26-2.91]<br><i>P</i> = 0.811 | 34 (38.4%)<br>HR 1.54 [0.75-3.16]<br><i>P</i> = 0.241 | 18 (27.6%)<br>HR 1.19 [0.49-2.88]<br><i>P</i> = 0.706 |
| Stage 3, n (%)                                                                                                                                                                                                                                                                                                                                                                                                                       | 93 (48.0%)<br>HR 2.47 [1.54-3.94]<br><i>P</i> <0.001   | 22 (58.1%)<br>HR 1.11 [0.33-3.78]<br><i>P</i> = 0.865 | 38 (52.0%)<br>HR 2.45 [1.19-5.05]<br><i>P</i> = 0.015 | 20 (36.6%)<br>HR 1.76 [0.74-4.18]<br><i>P</i> = 0.204 |
| Stage 4, n (%)                                                                                                                                                                                                                                                                                                                                                                                                                       | 73 (44.7%)<br>HR 2.45 [1.49-4.03]<br><i>P</i> <0.001   | 69 (58.4%)<br>HR 1.53 [0.47-5.00]<br><i>P</i> = 0.479 | 36 (50.2%)<br>HR 2.25 [1.09-4.65]<br><i>P</i> = 0.029 | 18 (39.3%)<br>HR 1.54 [0.62-3.81]<br><i>P</i> = 0.351 |
| AS = aortic stenosis; HG = high gradient; LG = low gradient; LF = classical low flow; NF = normal flow; pEF = preserved ejection fraction; HR = hazard ratio. HR was adjusted by age, sex, Society of Thoracic Surgeons Predicted Risk of Mortality, left ventricular rejection fraction, New York Heart Association class III or IV, estimated glomerular filtration rate, and the year of transcatheter aortic valve implantation. |                                                        |                                                       |                                                       |                                                       |

**Supplementary Table 6. Comparison of baseline characteristics between included and excluded patients.**

|                                                   | Included patients | Excluded patients | p-value |
|---------------------------------------------------|-------------------|-------------------|---------|
|                                                   | N = 2090          | N = 1496          |         |
| Age, years                                        | 82.0 ± 6.4        | 81.6 ± 6.3        | 0.007   |
| Female, n (%)                                     | 1046 (50.1)       | 696 (46.4)        | 0.029   |
| Body mass index, kg/cm <sup>2</sup>               | 26.5 ± 5.2        | 27.0 ± 5.4        | 0.009   |
| STS-PROM, %                                       | 5.8 ± 4.1         | 4.5 ± 3.8         | <0.001  |
| NYHA III or IV, n (%)                             | 1410 (67.6)       | 874 (58.4)        | <0.001  |
| <b>Concomitant diseases</b>                       |                   |                   |         |
| Hypertension, n (%)                               | 1791 (85.8)       | 1343 (89.6)       | <0.001  |
| Diabetes mellitus, n (%)                          | 561 (26.9)        | 413 (27.6)        | 0.656   |
| CKD (eGFR <60 mL/min/1.73 m <sup>2</sup> ), n (%) | 1442 (69.2)       | 938 (62.7)        | <0.001  |
| eGFR, mL/min/1.73 m <sup>2</sup>                  | 51.4 ± 21.6       | 52.1 ± 22.2       | 0.433   |
| COPD, n (%)                                       | 264 (12.7)        | 132 (8.8)         | <0.001  |
| Coronary artery disease, n (%)                    | 1245 (59.7)       | 828 (55.2)        | 0.008   |
| Atrial fibrillation, n (%)                        | 742 (35.6)        | 466 (31.1)        | 0.005   |
| <b>Previous history</b>                           |                   |                   |         |
| Previous myocardial infarction, n (%)             | 308 (14.8)        | 188 (12.5)        | 0.058   |
| Previous cardiac surgery, n (%)                   | 311 (14.9)        | 205 (13.7)        | 0.302   |
| Previous stroke, n (%)                            | 260 (12.5)        | 172 (11.5)        | 0.372   |
| Previous permanent pacemaker implantation, n (%)  | 182 (8.7)         | 116 (7.7)         | 0.293   |
| Peripheral artery disease, n (%)                  | 299 (14.3)        | 165 (11.0)        | 0.003   |
| <b>Echocardiography</b>                           |                   |                   |         |
| Left ventricular ejection fraction, %             | 54 ± 14           | 56 ± 14           | 0.005   |
| Aortic Valve Area, cm <sup>2</sup>                | 0.73 ± 0.25       | 0.80 ± 0.28       | <0.001  |
| Mean Aortic valve pressure gradient, mmHg         | 40 ± 17           | 39 ± 17           | 0.344   |

AS = aortic stenosis; HG = high gradient; LG = low gradient; LF = classical low flow; NF = normal flow; pEF = preserved ejection fraction; STS-PROM = Society of Thoracic Surgeons Predicted Risk of Mortality; NYHA = New York Heart Association; CKD = chronic kidney disease; eGFR = estimated glomerular filtration rate; COPD = chronic obstructive pulmonary disease.
